# Supplementary material for: Pollination of Cretaceous flowers
Source: PubMed Central journal article supplement (PMC6900596; doi:10.1073/pnas.1916186116), 2019-11-11
Supplement: pnas.1916186116.sapp.pdf [file pnas.1916186116.sapp.pdf]

Table S1. Length and width measurements of pollen grains.

Table S1. Length and width measurements of pollen grains.

| Length ( $\mu\text{m}$ ) | Width ( $\mu\text{m}$ ) |
|--------------------------|-------------------------|
| 22.50                    | 14.31                   |
| 25.83                    | 17.92                   |
| 27.54                    | 19.29                   |
| 23.80                    | 20.01                   |
| 23.06                    | 16.36                   |
| 23.90                    | 16.46                   |
| 24.44                    | 16.17                   |
| 22.08                    | 20.68                   |
| 23.60                    | 16.86                   |
| 22.75                    | 15.91                   |
| 27.05                    | 17.06                   |
| 30.95                    | 15.90                   |
| 22.55                    | 18.17                   |
| 27.13                    | 18.57                   |
| 24.98                    | 17.39                   |
| 28.40                    | 15.38                   |
| 26.95                    | 15.77                   |
| 25.11                    | 14.53                   |
| 28.89                    | 18.31                   |
| 27.12                    | 14.42                   |
| 29.83                    | 19.39                   |
| 23.98                    | 14.05                   |
| 25.79                    | 14.33                   |
| 22.24                    | 15.01                   |
| 25.71                    | 14.40                   |
| 23.41                    | 13.93                   |
| 30.58                    | 14.80                   |

Note: Pollen length is the maximum value between two polar points, and pollen width is the maximum value of the equatorial zone.

Video S1 Legend: Micro-tomographic reconstruction of Cretaceous tumbling flower beetle *Angimordella burmitina*.
